# Supplementary material
Source: PubMed Central journal article supplement (PMC2230690)

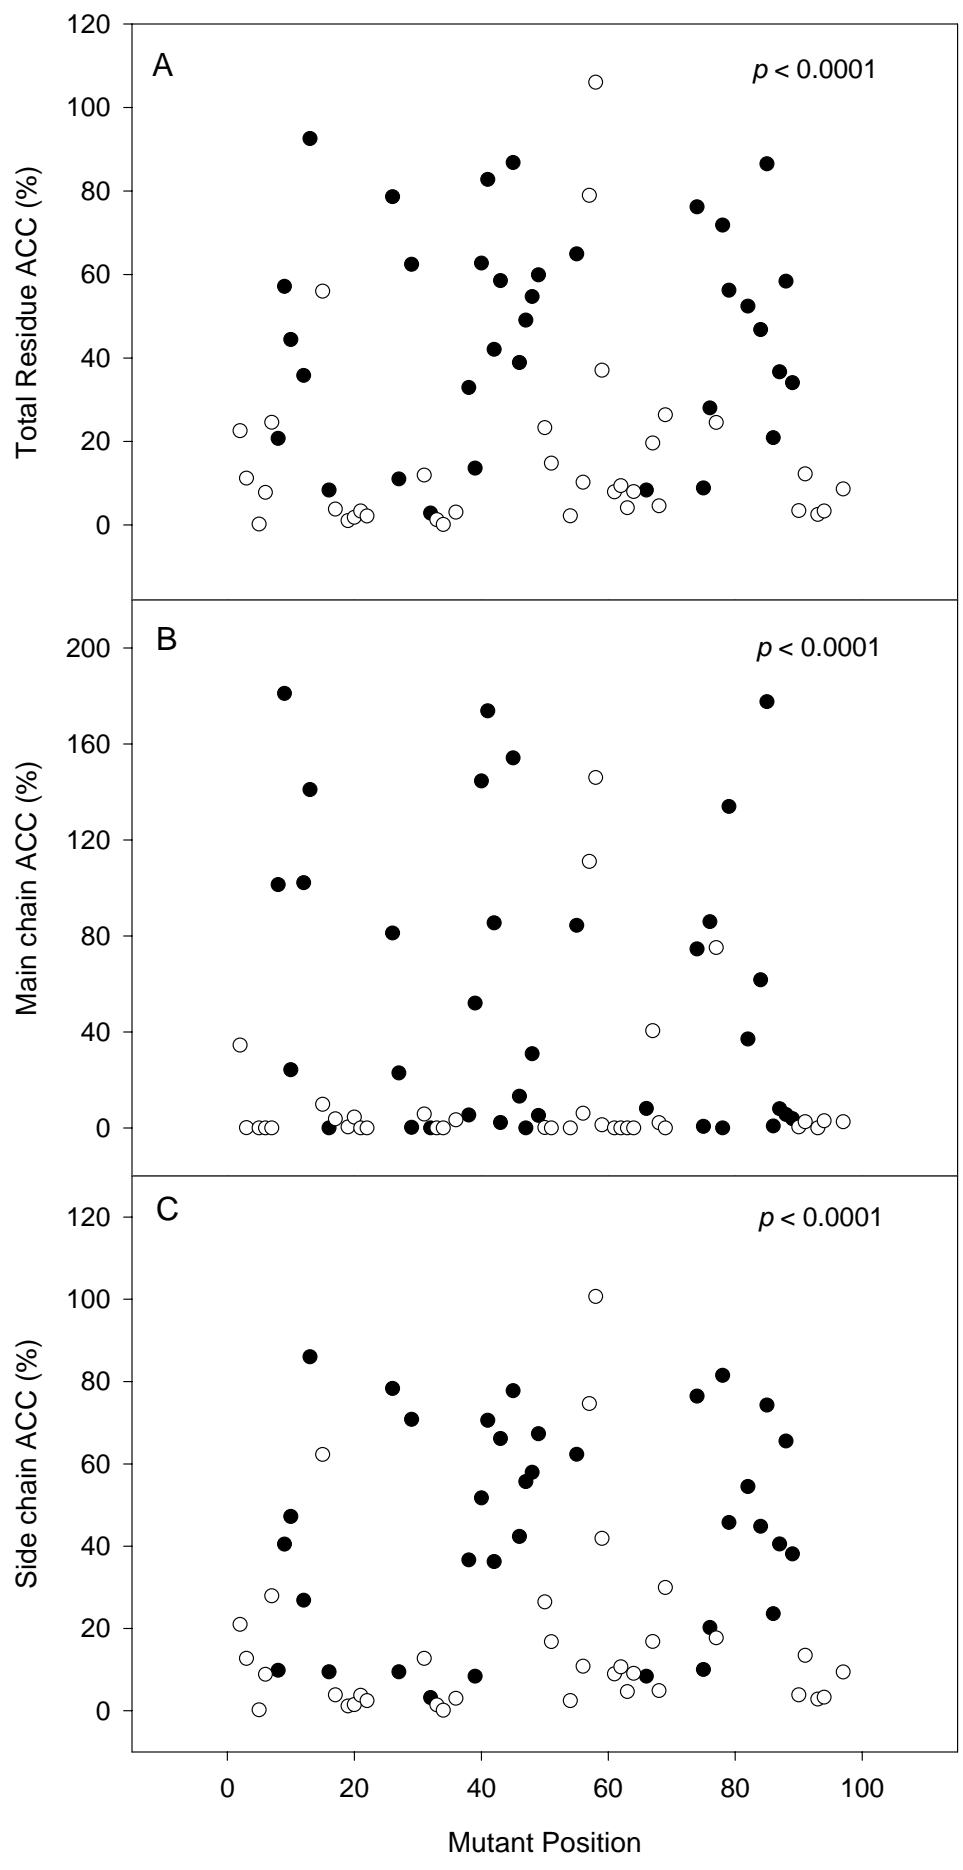

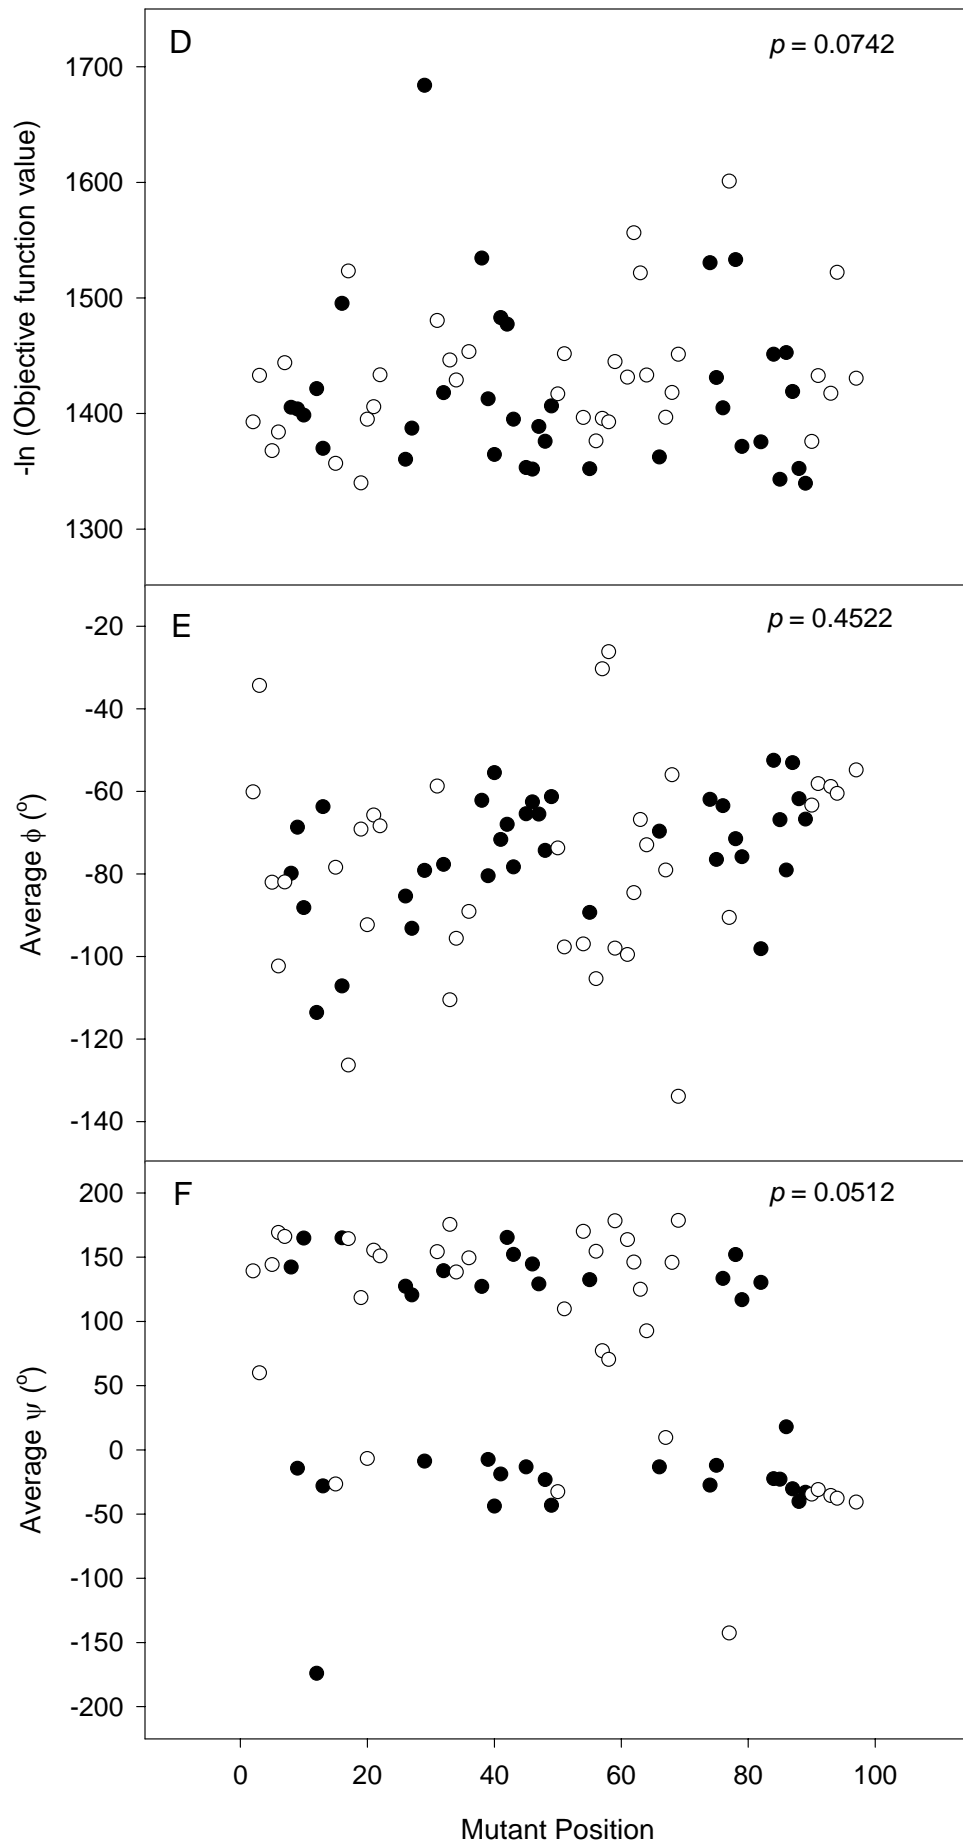

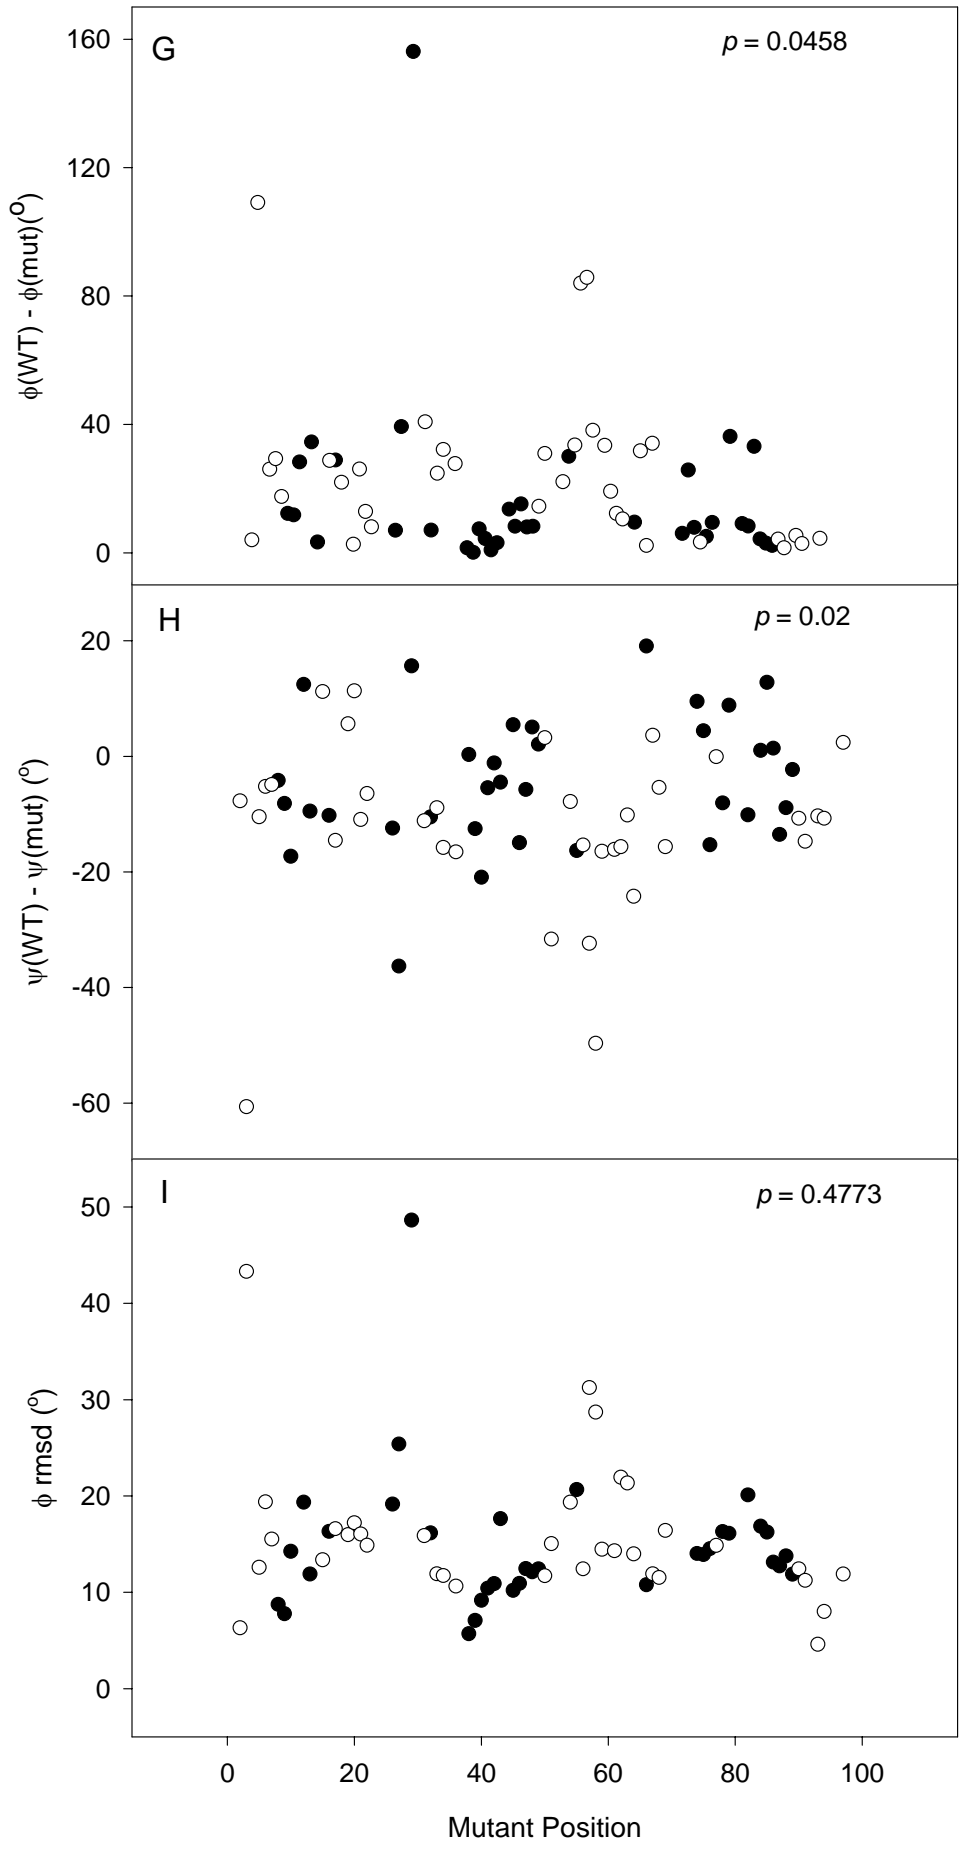

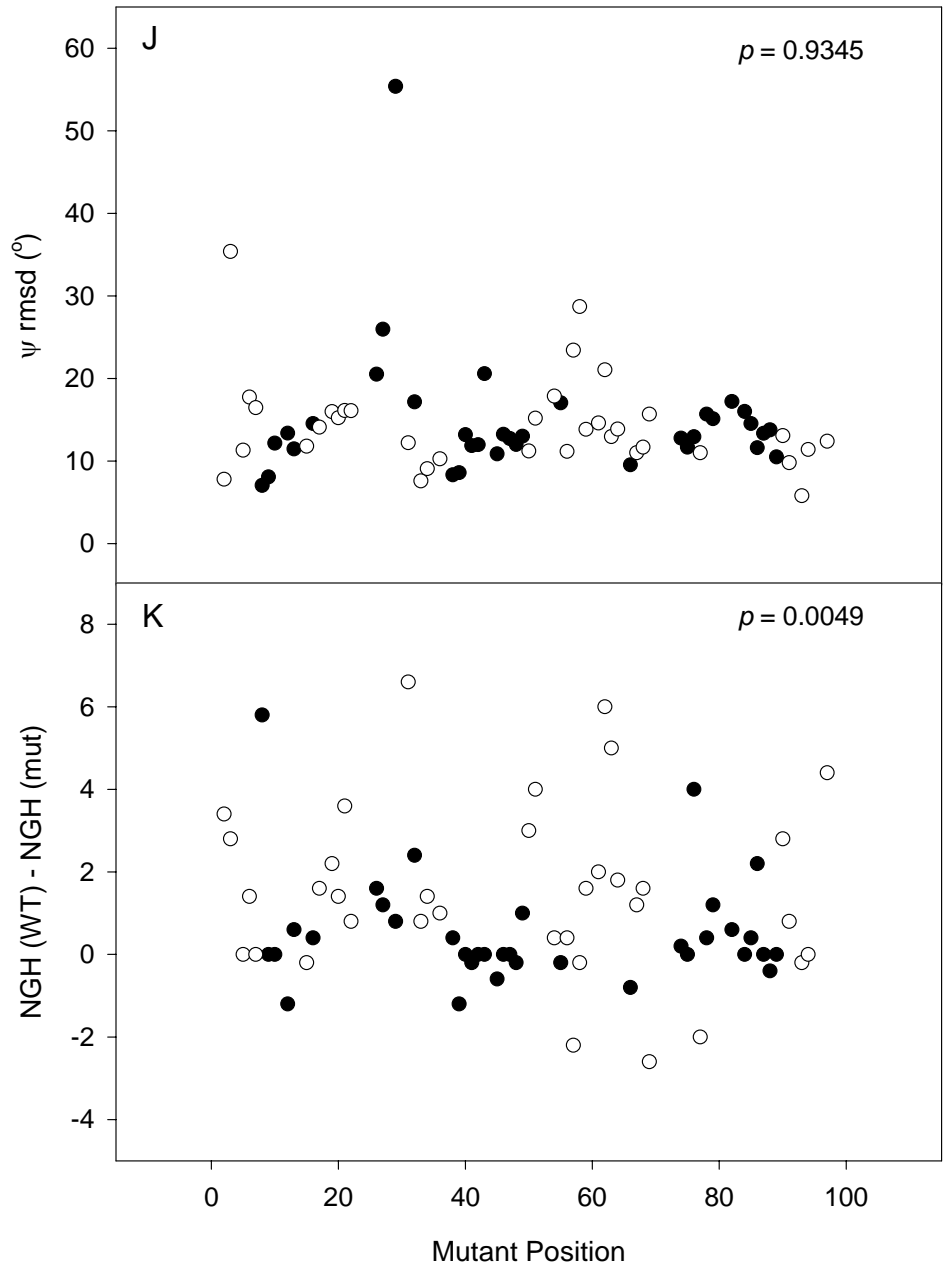

Supplement: pcbi.0030241.sg002.pdf [file pcbi.0030241.sg002.pdf]
